# Supplementary material for: Towards an easier creation of three-dimensional data for embedding into scholarly 3D PDF (Portable Document Format) files
Source: PeerJ. 2015 Mar 3;3:e794. doi: 10.7717/peerj.794 (PMC4358654; doi:10.7717/peerj.794)
Supplement: Supplemental Information 3 — An example U3D file of lumbar vertebrae as shown in Fig. 5 and the resulting 3D PDF. [file peerj-03-794-s003.zip]

Archive with 2 entries (2 files):
- Vertebrae-Example.u3d
- Vertebrae-Example.3d.pdf
