# Supplementary material for: Towards an easier creation of three-dimensional data for embedding into scholarly 3D PDF (Portable Document Format) files
Source: PeerJ journal article supplement (doi:10.7717/peerj.794), 2015-03-03

# Towards an easier creation of three-dimensional Data for embedding into scholarly 3D PDF (Portable Document Format) files

Axel Newe

Supplementary File S2

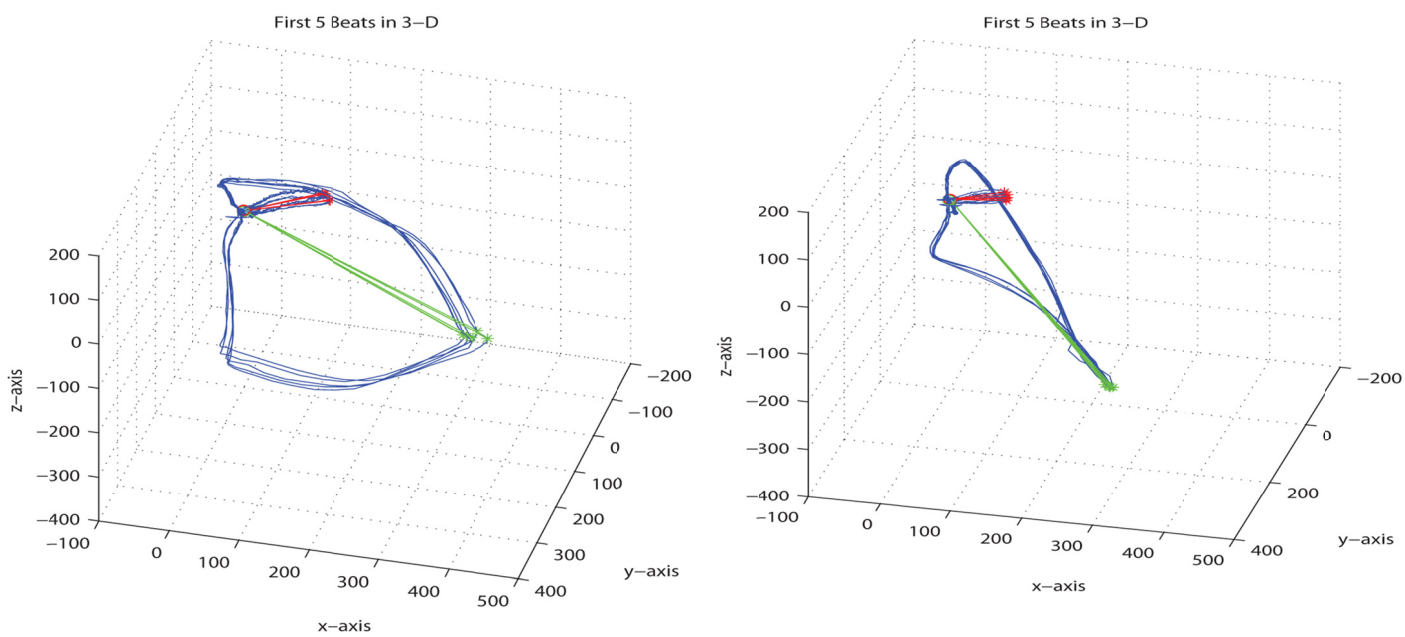

The above VCG illustrations were published in (Sur, Han & Tereshchenko, 2013). The original figure image is licensed under CC-BY 4.0 (<http://creativecommons.org/licenses/by/4.0/>).

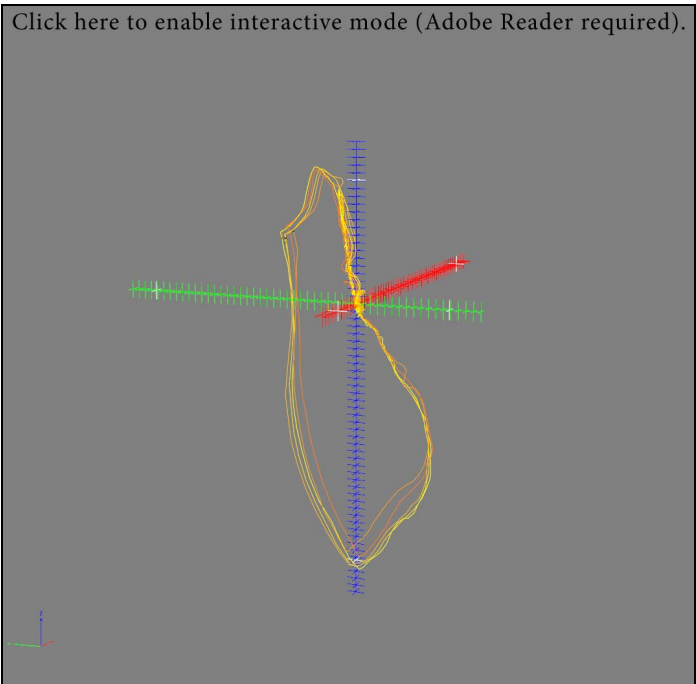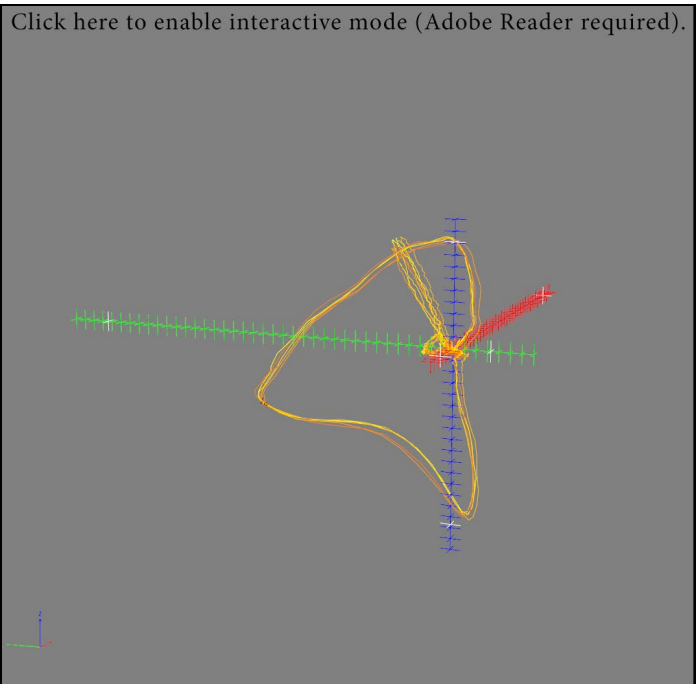

Supplement: VCG-Examples.zip [file VCG-Examples.zip]
